# Supplementary material for: Pan-genomic analysis to redefine species and subspecies based on quantum discontinuous variation: the Klebsiella paradigm
Source: PubMed Central journal article supplement (PMC4588269; doi:10.1186/s13062-015-0085-2), 2015-09-30
Supplement: 13062_2015_85_MOESM2_ESM.pdf [file 13062_2015_85_MOESM2_ESM.pdf]

| Categories | <i>K.pneumoniae</i> 1084 | <i>K.pneumoniae</i> Ec18 | <i>K.pneumoniae</i> HS11286 | <i>K.pneumoniae</i> KCTC 2242 | <i>K.pneumoniae</i> MGH 78578 | <i>K.pneumoniae</i> NTUH K2044 | <i>K.pneumoniae</i> ozaenae ATCC 11296 |
|------------|--------------------------|--------------------------|-----------------------------|-------------------------------|-------------------------------|--------------------------------|----------------------------------------|
| J          | 198                      | 204                      | 199                         | 204                           | 202                           | 206                            | 191                                    |
| A          | 1                        | 1                        | 1                           | 1                             | 1                             | 1                              | 1                                      |
| K          | 430                      | 459                      | 456                         | 459                           | 459                           | 457                            | 396                                    |
| L          | 173                      | 192                      | 228                         | 195                           | 233                           | 201                            | 224                                    |
| B          | 1                        | 1                        | 1                           | 1                             | 1                             | 1                              | 1                                      |
| D          | 41                       | 44                       | 50                          | 44                            | 44                            | 44                             | 43                                     |
| V          | 63                       | 67                       | 76                          | 65                            | 75                            | 62                             | 60                                     |
| T          | 215                      | 232                      | 214                         | 232                           | 223                           | 234                            | 186                                    |
| M          | 237                      | 241                      | 243                         | 242                           | 251                           | 246                            | 222                                    |
| N          | 62                       | 63                       | 58                          | 63                            | 70                            | 64                             | 44                                     |
| U          | 116                      | 114                      | 116                         | 114                           | 121                           | 121                            | 99                                     |
| O          | 154                      | 161                      | 161                         | 160                           | 156                           | 158                            | 139                                    |
| C          | 309                      | 311                      | 325                         | 315                           | 314                           | 315                            | 294                                    |
| G          | 571                      | 546                      | 573                         | 544                           | 565                           | 581                            | 503                                    |
| E          | 482                      | 519                      | 489                         | 516                           | 486                           | 500                            | 465                                    |
| F          | 106                      | 104                      | 110                         | 103                           | 102                           | 109                            | 97                                     |
| H          | 201                      | 200                      | 207                         | 199                           | 204                           | 206                            | 194                                    |
| I          | 131                      | 135                      | 134                         | 134                           | 129                           | 129                            | 102                                    |
| P          | 328                      | 346                      | 323                         | 345                           | 329                           | 348                            | 320                                    |
| Q          | 133                      | 116                      | 121                         | 114                           | 110                           | 125                            | 97                                     |
| R          | 511                      | 553                      | 564                         | 546                           | 526                           | 541                            | 508                                    |
| S          | 392                      | 417                      | 426                         | 417                           | 409                           | 410                            | 386                                    |
| Total      | 4855                     | 5026                     | 5075                        | 5013                          | 5010                          | 5059                           | 4572                                   |
